# Supplementary material
Source: publisher figshare collection journal article supplement (https://tandf.figshare.com/ndownloader/files/28102101)
Supplement: Supplementary file 1 [file 28102101]

Late Ediacaran post-collisional magmatism in the Guéra Massif, South-Central Chad

J. Gregory Shellnutta*, Meng-Wan Yeha, Ngoc Ha T. Phama, and Tung-Yi Leea

aNational Taiwan Normal University, Department of Earth Science, 88 Tingzhou Road Section 4, Taipei 11677, Taiwan

*Corresponding author: J.G. Shellnutt (email: jgshelln@ntnu.edu.tw).


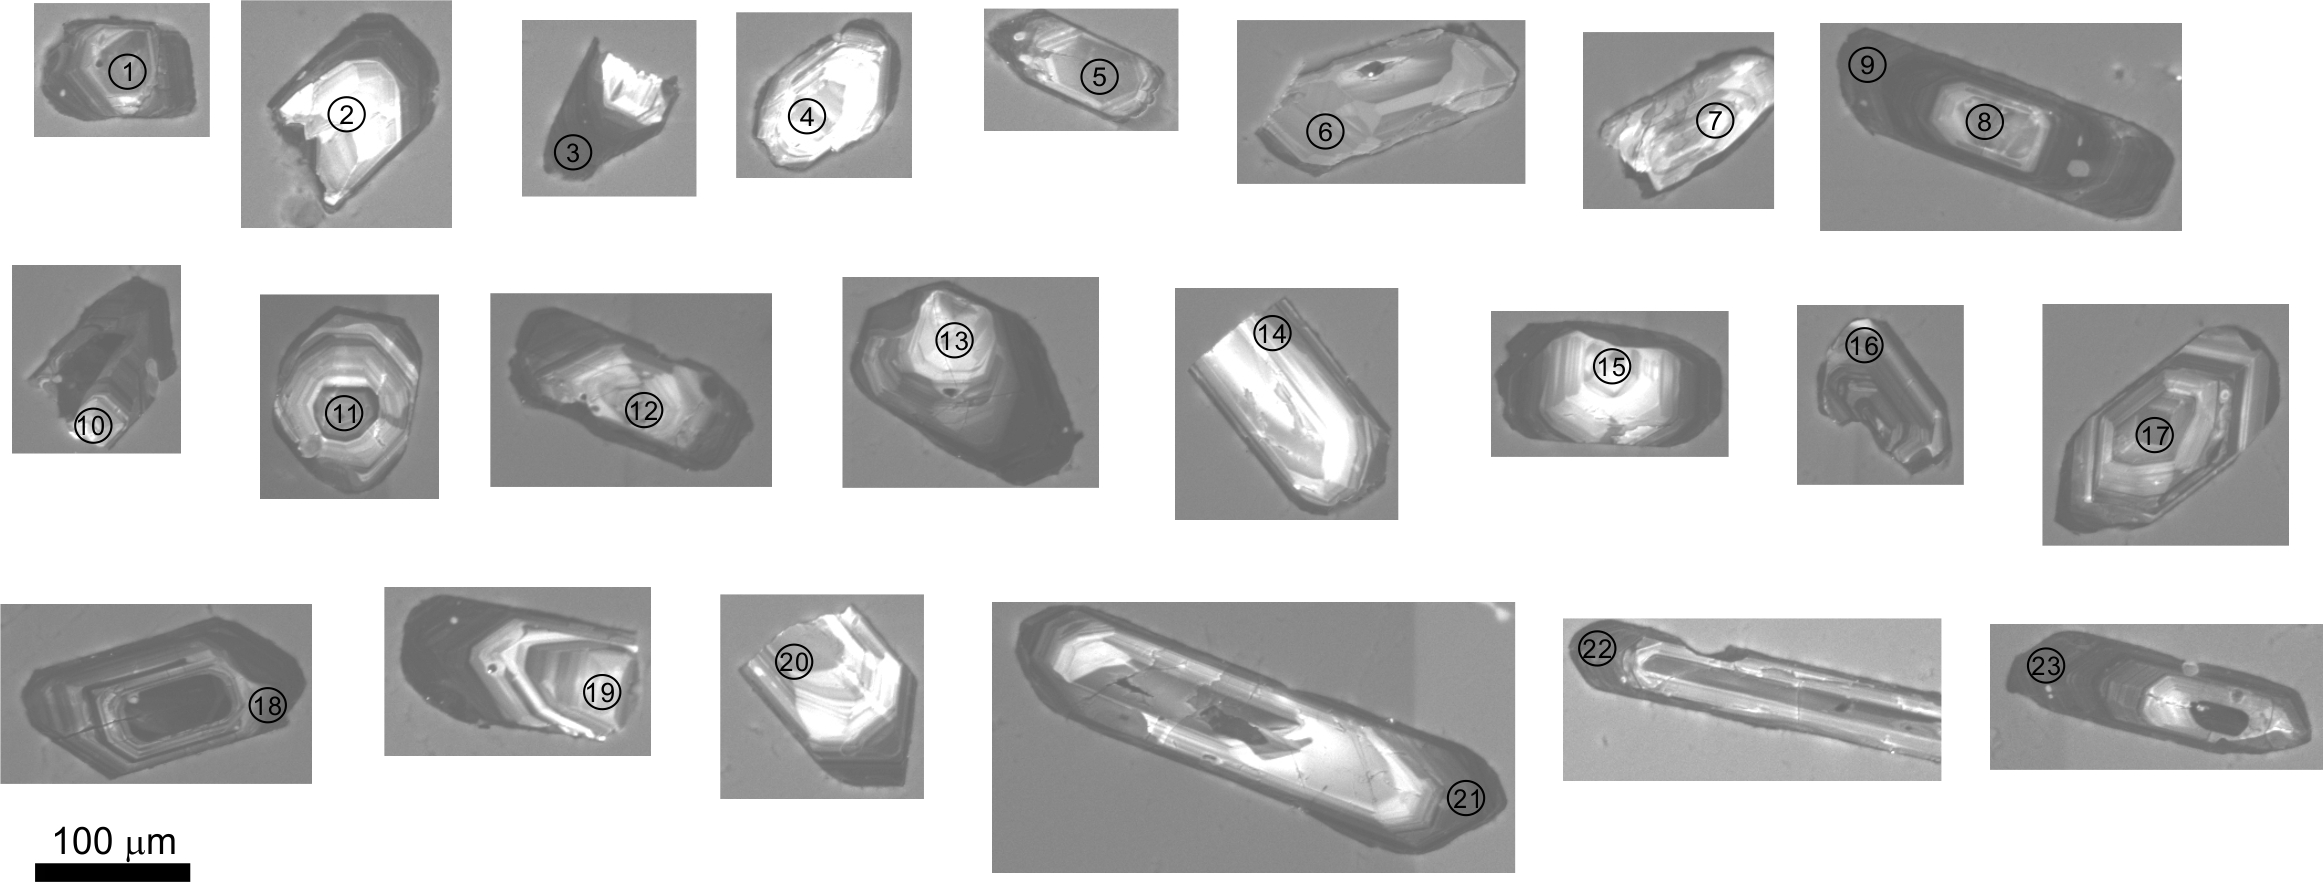


**Figure S1.** Cathodoluminescence images of the zircons from sample 14ZA24B. The spot number corresponds to the analysis in table S1 and spot location. The Th/U ratios are listed in table S1.
